# Supplementary material for: Genetic and dietary determinants of gut microbiome-bile acid interactions in the BXD recombinant inbred mouse population
Source: Research Square preprint supplement (doi:10.21203/rs.3.rs-4782355/v1), 2024-08-08
Supplement: Supplementary file 1 [file 96abc00ec93309355c324708.xlsx]

## Sheet: 12b_overlapped_QTL_indi_BA_MB
gMxBs	Phenotype	Chr	LOD	Diet	Type	QTL peak (Proximal position)	QTL peak (Distal position)
gMxB1	Turicibacter	4	4.28626	CD	Microbiome	46.3467	68.2749
	CA_vs_all_liver_BA	4	3.80273	CD	BA	62.609	96.6686
	CA_plasma_BA_T0	4	3.77957	CD	BA	40.2785	65.9442
	CDCA_plasma_BA_T0	4	3.61351	CD	BA	31.4197	65.6311
	CA_vs_all_plasma_BA_T0	4	3.56299	CD	BA	32.0819	65.9442
	TCA_vs_all_plasma_BA_T0	4	3.98893	CD	BA	27.8006	53.1427
	TCA_vs_all_plasma_BA_T30	4	3.69232	CD	BA	19.5744	54.8986
gMxB2	Turicibacter	4	3.77428	CD	Microbiome	68.2749	88.0391
	CA_vs_all_liver_BA	4	3.80273	CD	BA	62.609	96.6686
gMxB3	Bacteroides	7	3.98251	HFD	Microbiome	55.6535	63.4429
	X7Keto.LCA_feces_BA	7	3.19243	HFD	BA	46.8552	62.2097
	X7Keto.DCA_vs_all_feces_BA	7	3.39818	HFD	BA	46.8552	62.2097
gMxB4	Lachnoclostridium	7	4.4343	HFD	Microbiome	40.9188	46.3275
	aMCA_feces_BA	7	3.77533	HFD	BA	41.9542	55.608
	TLCA_feces_BA	7	3.63325	HFD	BA	40.3865	46.4496
	UDCA_feces_BA	7	3.61739	HFD	BA	42.2146	55.591
